# Supplementary material for: Carotid Arteries in Cerebral Small Vessel Disease and Dementia
Source: Research Square preprint supplement (doi:10.21203/rs.3.rs-7852432/v1), 2025-11-11
Supplement: Supplementary file 1 [file 6f0d69651e33d1e7530d393c.docx]

**Supplementary Tables 1 and 2**

**Carotid Arteries in Cerebral Small Vessel Disease and Dementia**

Erika Kitajima,1 Ashley Suwanda,1 Dan Jobson,1 Louise Allan,2 Kian Paydar,1 Gan Han,1 Kauzo Washida,3 Masafumi Ihara,3 Pazhanichamy Kalailingam,4 Yoshiki Hase,1 Newman SK Sze,5 Tuomo Polvikoski,1 and Raj N. Kalaria1*

**Supplementary Table 1**

**Correlations between ICA stenosis or sclerosis with various cerebral pathologies**

| **Variable** | **ICA Stenosis†** | *P value* | **ICA Sclerosis†** | *P value* |
| --- | --- | --- | --- | --- |
| Age (yr) | 0.165 | 0.54 | 0.140 | 0.105 |
| Brain Weight (g) | 0.034 | 0.713 | 0.027 | 0.769 |
| **Parenchymal Pathology** |  | | | |
| Total SVD Pathology Score | **0.258** | *0.034* | 0.182 | 0.142 |
| Total Vascular Lesions | **0.341** | *0.001* | **0.240** | *0.007* |
| Cortical Lesions | 0.073 | 0.491 | 0.054 | 0.615 |
| Subcortical Lesions | **0.246** | *0.019* | 0.136 | 0.205 |
| WM scores | **0.485** | *0.001* | **0.423** | *0.001* |
| **Cerebral Circulation** |  | | | |
| Anterior Circulation | **0.339** | 0.001 | **0.239** | 0.010 |
| Posterior  Circulation | 0.129 | 0.164 | 0.064 | 0.495 |
| **Vessel Pathology** |  | | | |
| Circle of Willis | **0.337** | *0.001* | **0.314** | *0.001* |
| Basilar Artery | **0.420** | *0.001* | **0.348** | *0.001* |
| Cerebral Arteries | **0.387** | *0.001* | **0.349** | *0.001* |
| Total Intracranial Artery Score | **0.420** | *0.001* | **0.365** | *0.001* |

†Values represent Pearson correlation values for n=137 to 156 pairs. Pearson correlations were calculated assuming equal variances. There was also a linear relationship between ICA stenosis and ICA sclerosis (Pearson r=0.925, *P*<0.001). ‡Dementia defined by DSM IV, IVR or V criteria was not associated with severity of ICA stenosis or sclerosis (cf. Table 1) Abbreviations: ICA, internal carotid arteries.

**Supplementary Table 2**

1. **ANOVA for ICA Stenosis on Pathological diagnosis of dementia**

| Predominant type of pathology associated with dementia | **N** | **Mean** | **SE** | **95% CI for Mean** | | **P value*** |
| --- | --- | --- | --- | --- | --- | --- |
| Lower Bound | Upper Bound |
| NSP† | 18 | 46.5% | 2.7% | 40.9% | 52.2596% |  |
| Cerebrovascular disease | 68 | 60.3% | 1.8% | 56.8% | 63.8% | <0.001 |
| Primary Neurodegenerative disease†† | 33 | 50.9% | 1.5% | 47.9% | 53.9% | 0.643 |
| Mixed‡ | 17 | 58.8% | 3.0% | 52.4% | 65.2% | 0.025 |
| Total | 136 | 56.0% | 1.2% | 53.7% | 58.3% | <0.001 |

**B) ANOVA for ICA Sclerosis on Pathological diagnosis of dementia**

| Predominant type of pathology associated with dementia | **N** | **Mean** | **SE** | **95% CI for Mean** | | **P value*** |
| --- | --- | --- | --- | --- | --- | --- |
| Lower Bound | Upper Bound |
| NSP† | 18 | .267 | .02 | .230 | .304 |  |
| Cerebrovascular disease | 67 | .379 | .02 | .349 | .410 | <0.001 |
| Primary Neurodegenerative disease†† | 33 | .305 | .01 | .283 | .328 | 0.598 |
| Mixed‡ | 18 | .377 | .03 | .323 | .430 | 0.011 |
| Total | 136 | .346 | .01 | .327 | .365 | <0.001 |

*Compared to NSP; Tukey HD and Dunnett’s post-hoc tests. †NSP, No significant pathology. ††Primary neurodegenerative disease included mainly AD, DLB or PD. ‡Mixed included AD + VaD or AD + DLB +VaD or PSP + VaD. Abbreviations; ANOVA, one-way analysis of variance; AD, Alzheimer’s disease; DLB, dementia with Lewy bodies; PD, Parkinson’s disease; PSP, progressive supranuclear palsy; VaD, vascular dementia.
